# Supplementary material
Source: MDPI journal article supplement (https://www.mdpi.com/2297-8739/9/11/376)
Supplement: s1 [file s1]

## Spectrum data

### A. 5-FU match to commercial 5-FU (99.9%)

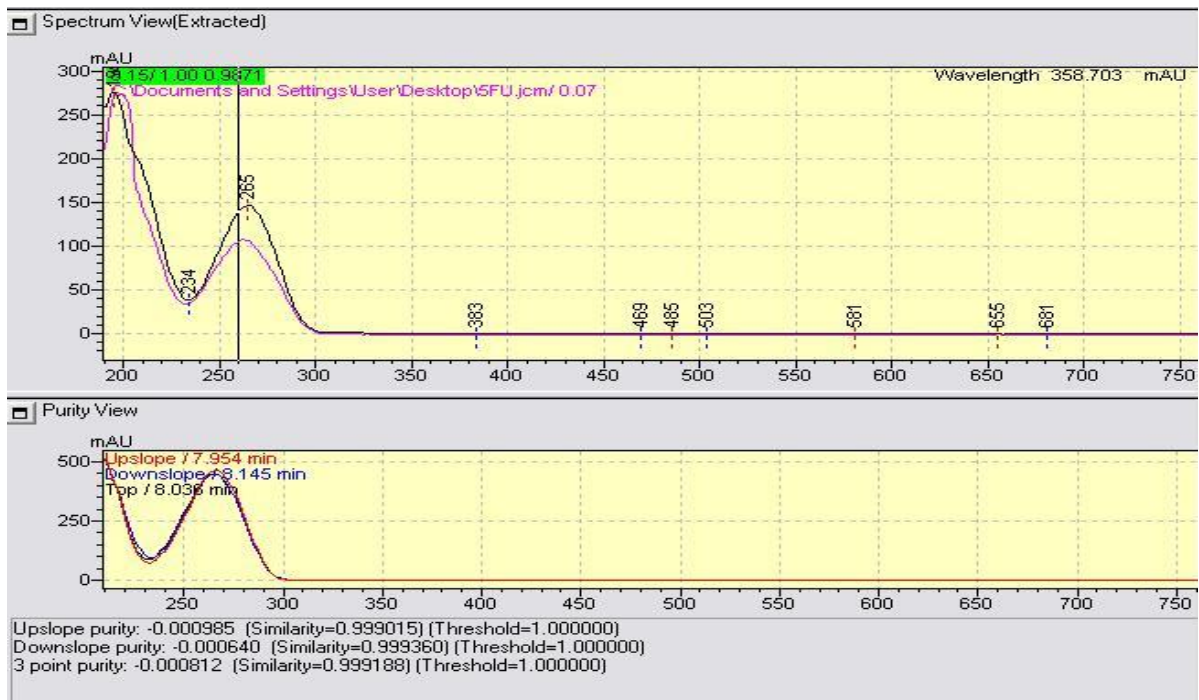

### B. Uracil match to commercial uracil (96.8%)

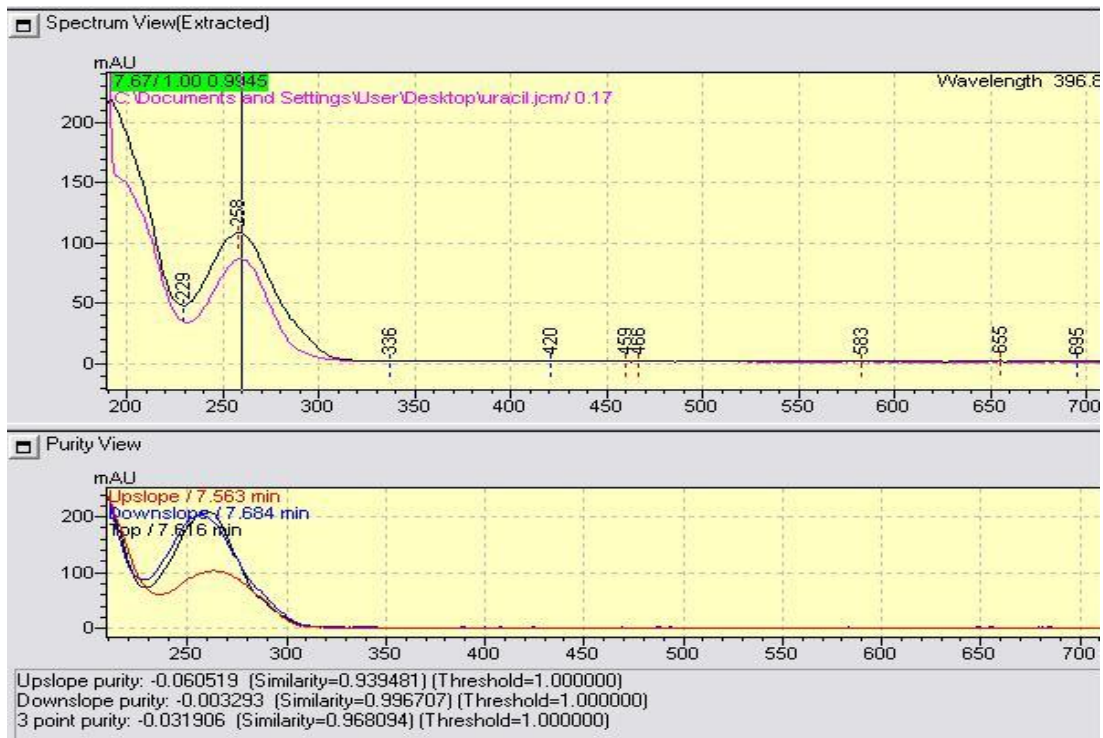

### C. FdUMP match to commercial FdUMP (99.0%)

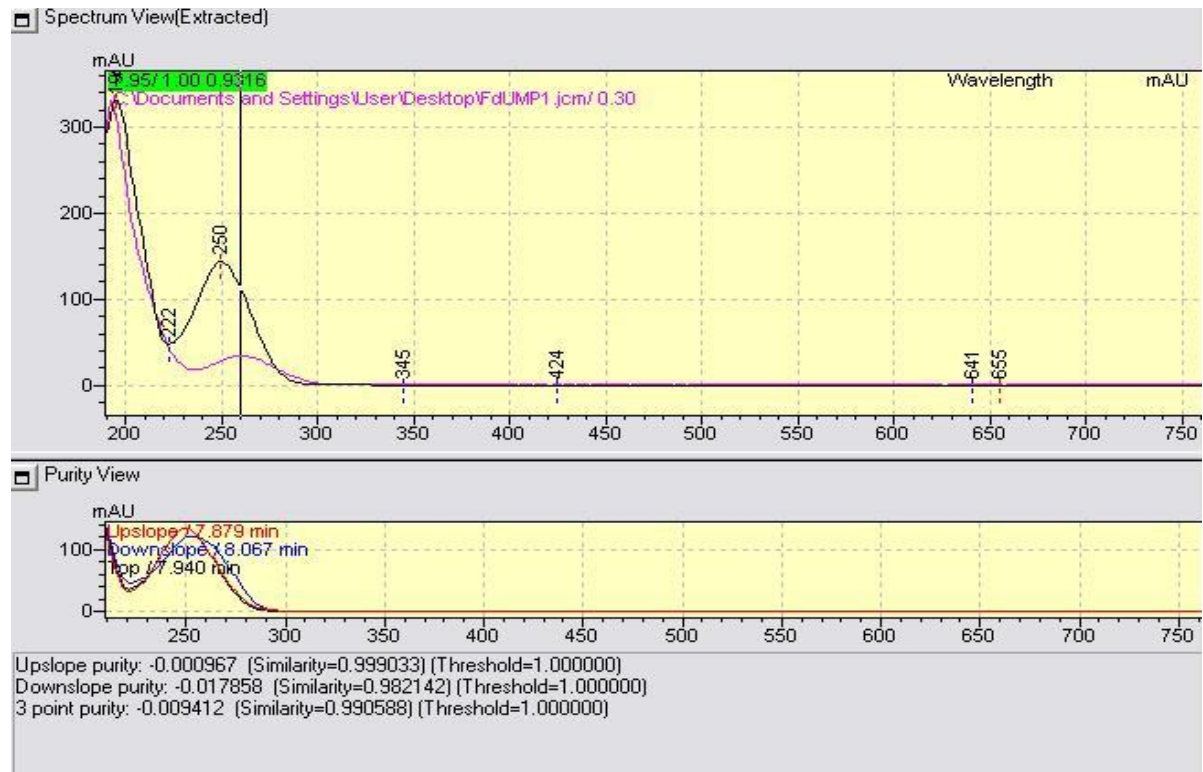

### D. Peak retention time 7.8 Mismatch to 5-FU (75.6%)

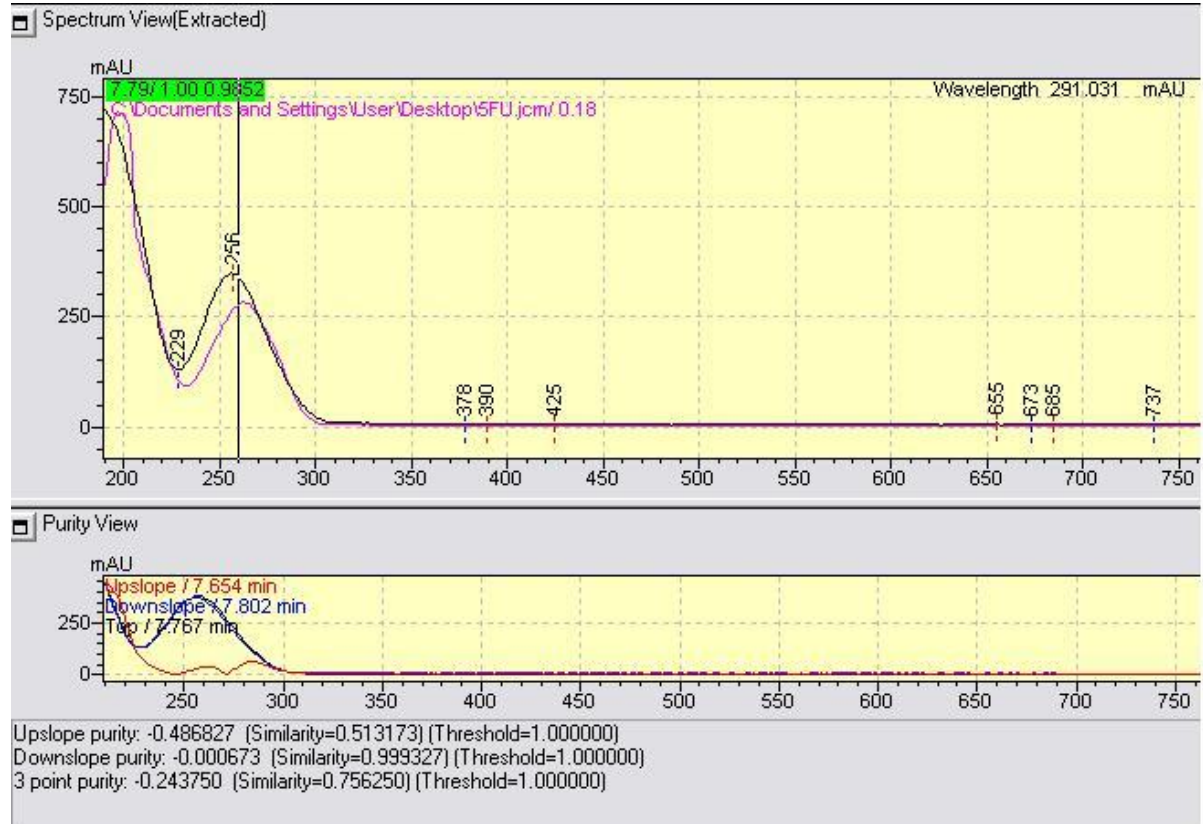

### E. Peak retention time 7.8 Mismatch to Uracil (75.6%)

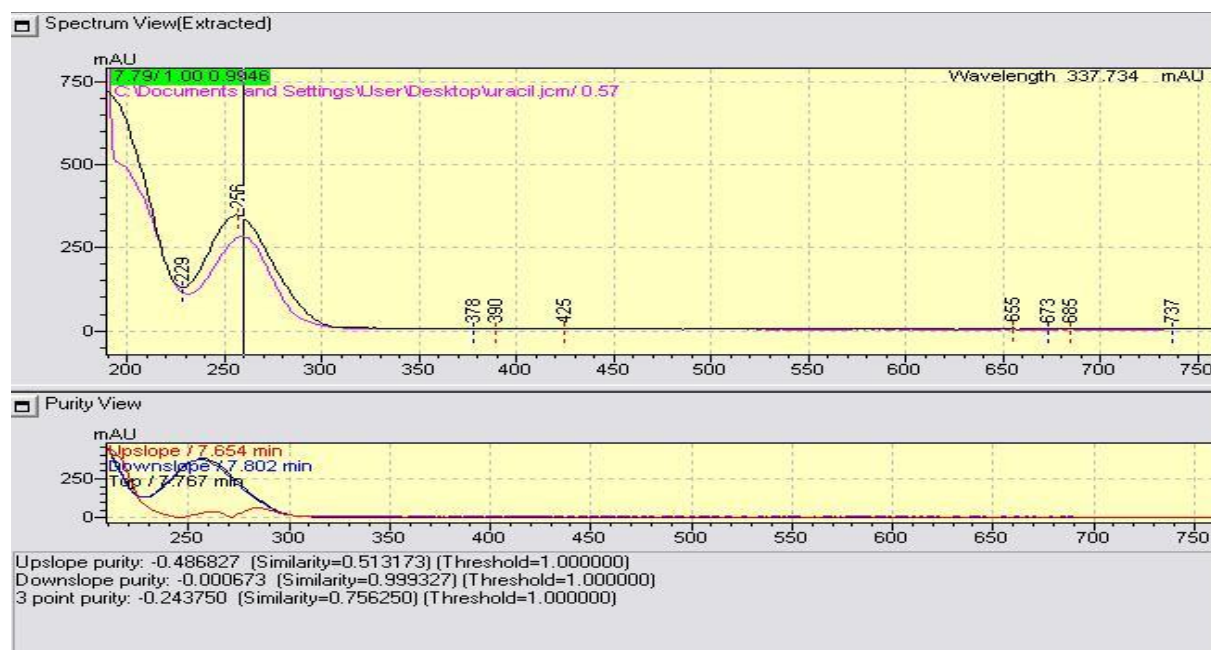

### F. MS analysis

Peak 7.8 min present study

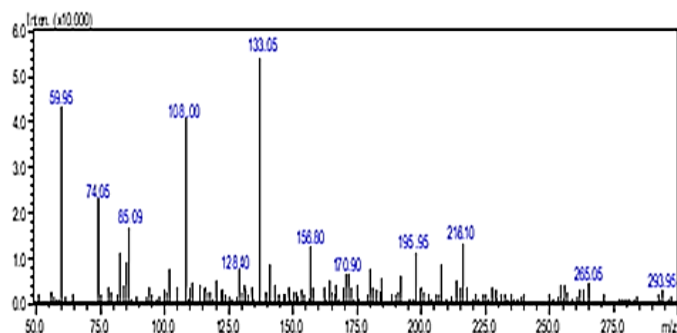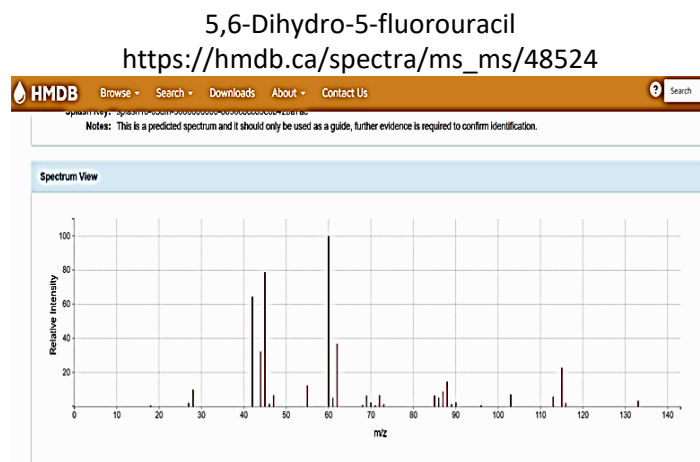

|        |           |                 |    |
|--------|-----------|-----------------|----|
| 108.08 | M+2ACN+2H | M/2 + 42.033823 | 2+ |
| 133.09 | M+H       | M + 1.007276    | 1+ |
| 156.80 | M+Na      | M + 22.989218   | 1+ |
| 196.95 | M+ACN+Na  | M + 64.015765   | 1+ |
| 265.05 | 2M+H      | 2M + 1.007276   | 1+ |

**Figure S1.** Absorbance spectrum analysis of peak similarity for 5-FU (A), Uracil (B), 5FdUMP (C). Mismatch of extra peak with a retention time of 7.8 to both 5-FU (D), Uracil (E) and MS analysis (F).
